# Supplementary material for: A Hint on the COVID-19 Risk: Population Disparities in Gene Expression of Three Receptors of SARS-CoV
Source: Preprints.org preprint supplement (doi:10.20944/preprints202002.0408.v1), 2020-02-27
Supplement: Supplementary file 1 [file supplementary]

**A Hint on the COVID-19 Risk:** **Population Disparities in Gene Expression of Three Receptors of SARS-CoV**

### Guoshuai Cai†, Xiang Cui*, Xia Zhu*, Jun Zhou*

Department of Environmental Health Sciences, Arnold School of Public Health, University of South Carolina, Columbia, SC 29208

†Address correspondence to:

Guoshuai Cai

Department of Environmental Health Sciences

Arnold School of Public Health

University of South Carolina
915 Greene Street

Discovery 517

Columbia, SC 29204

GCAI@mailbox.sc.edu

Phone: 803-777-4120

*authors contributed equally to this manuscript

**A**


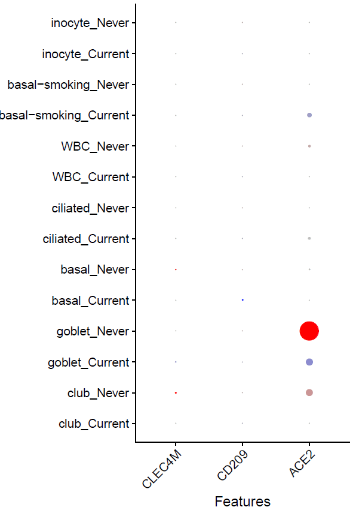

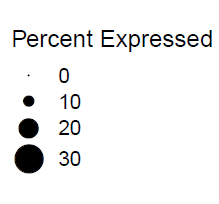

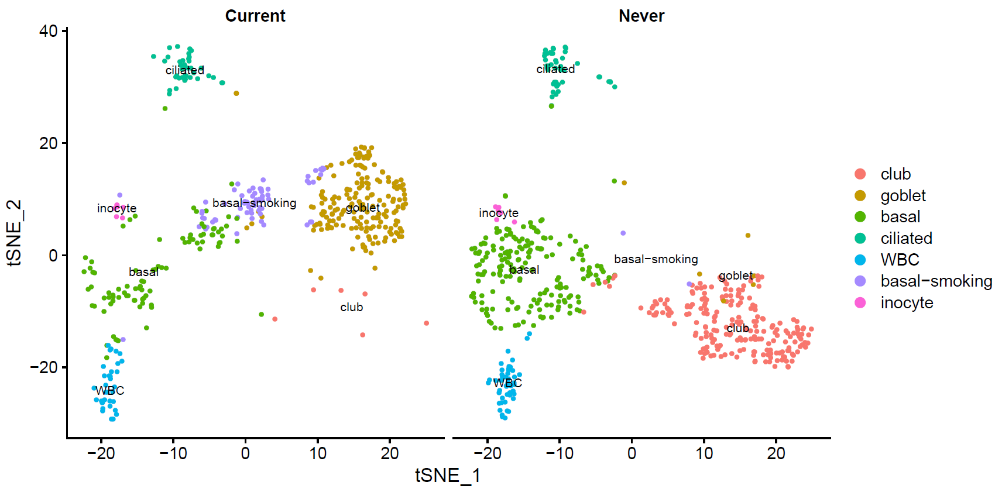


**C**


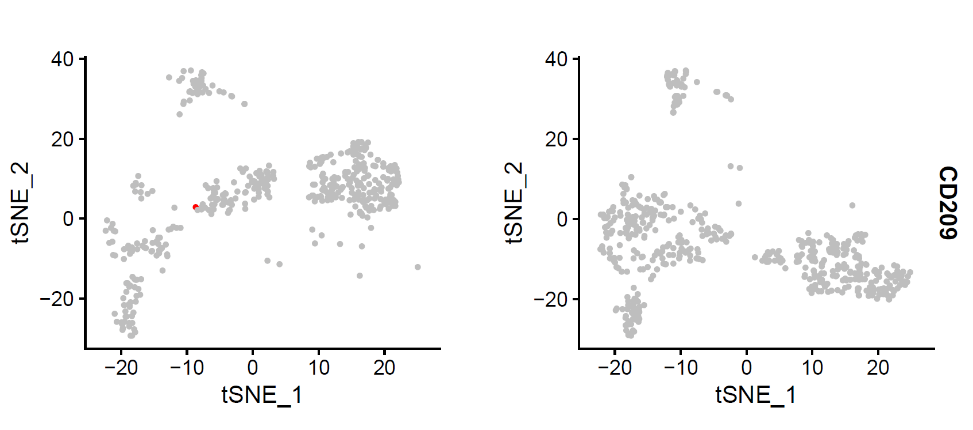


**B**

**Figure S1. Single-cell transcriptomics of bronchial epithelium cells.**

**A** shows tSNE plots of single-cell transcriptome profiles from never smokers and current smokers. **B** shows identified cell types. **C** shows detection rates of markers in each cell cluster. **D** and **E** show *ACE2* gene expression in cells of current smokers and never smokers, separately.

tcga

GSE40419


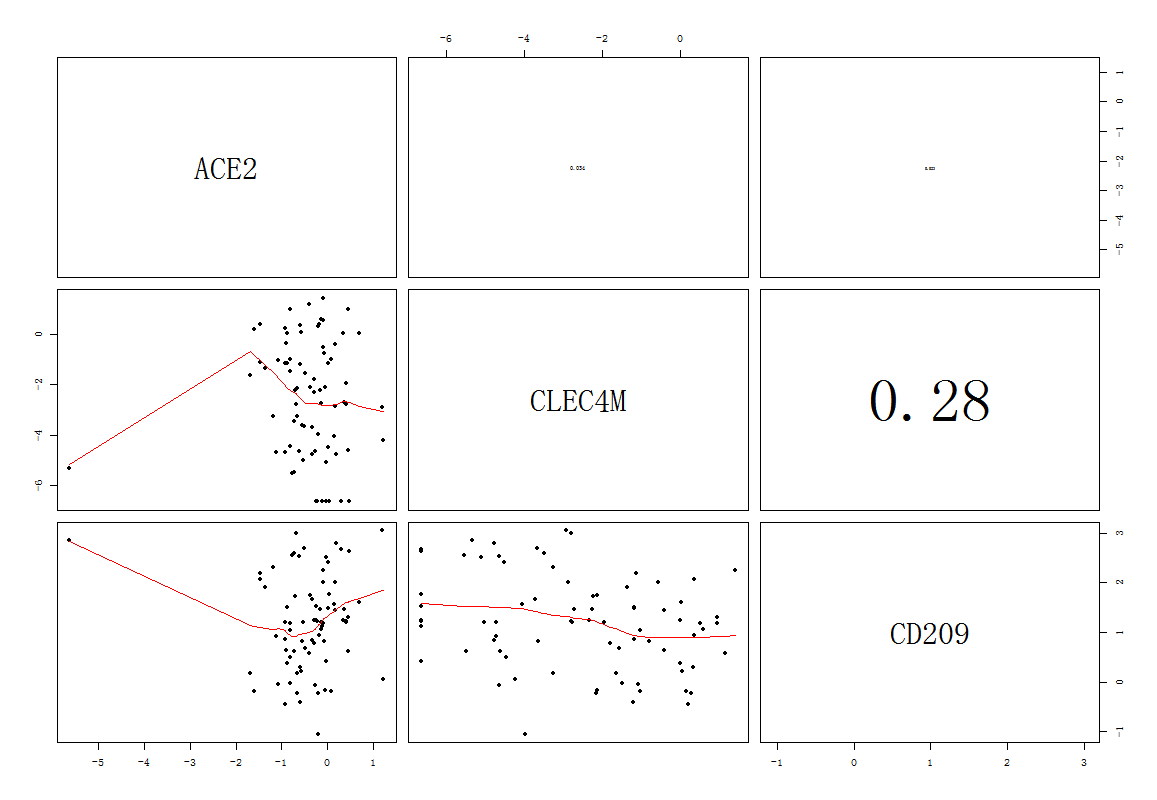

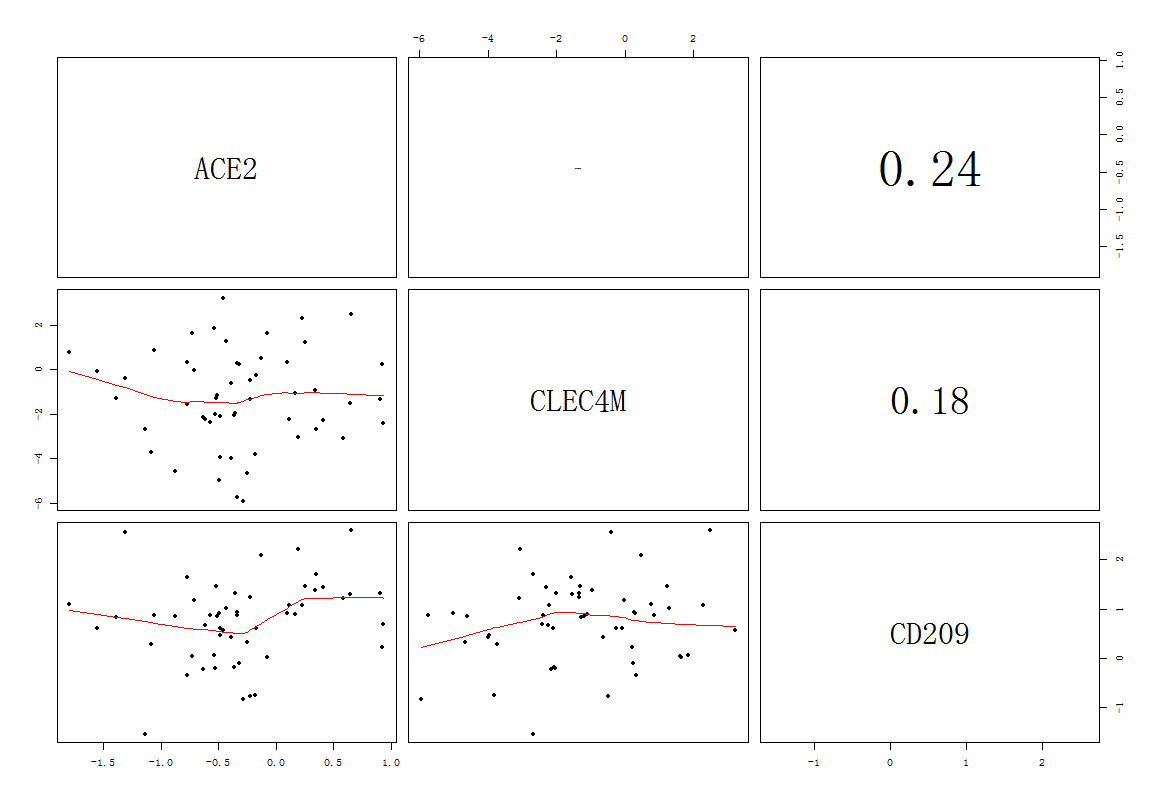


GSE10072

GSE19804


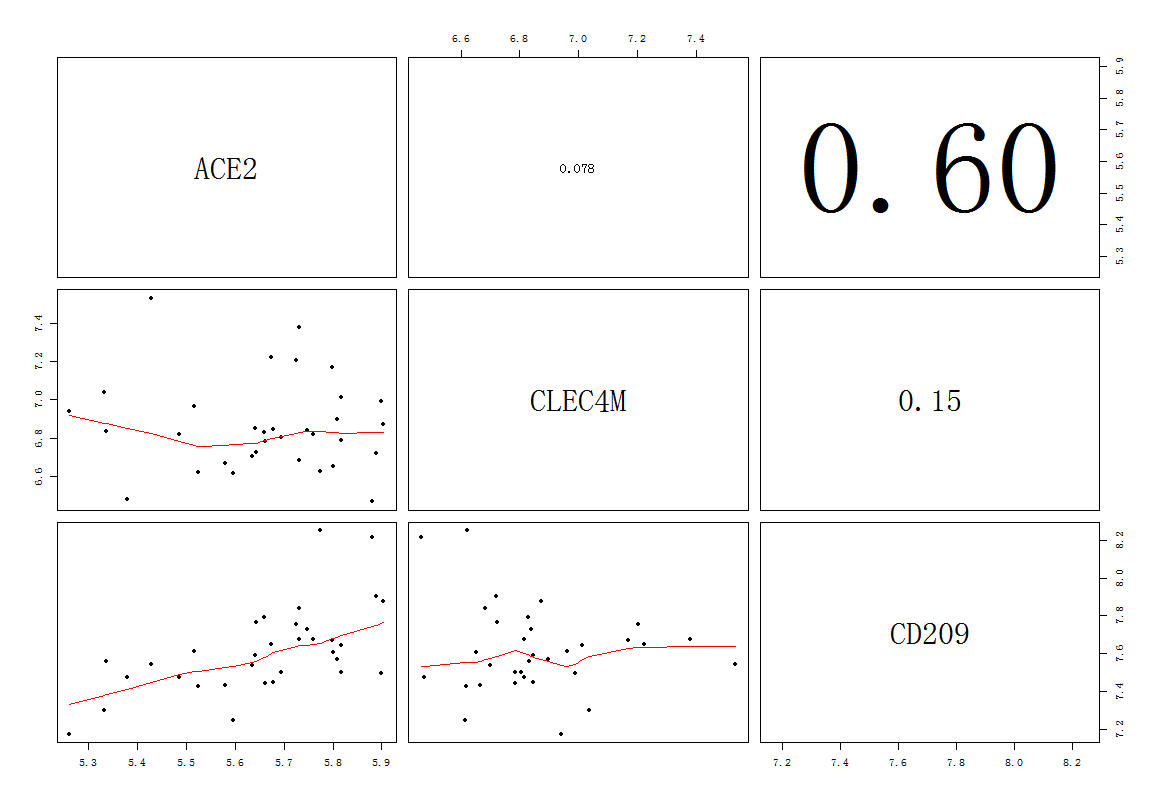

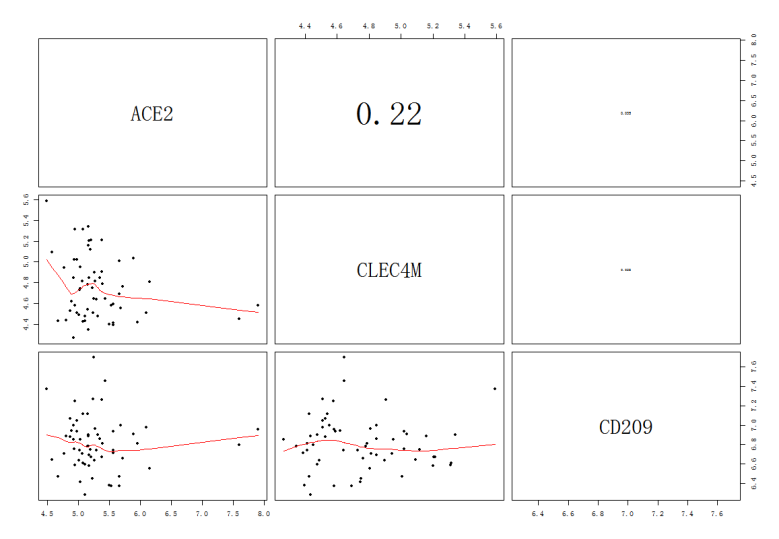


**Figure S2. Correlation of genes *ACE2*, *CLEC4M* and *CD209*, in four datasets.**

Lower panel shows pairwise scatter plots of data mean of each gene expression across samples. Upper panel shows their corresponding Pearson correlation coefficients.
