# Supplementary material for: A Hint on the COVID-19 Risk: Population Disparities in Gene Expression of Three Receptors of SARS-CoV
Source: Preprints.org preprint supplement (doi:10.20944/preprints202002.0408.v1), 2020-02-27
Supplement: Supplementary file 1 [file supplementary]

(listing pending)
